# Supplementary material for: Polygenic risk score-based phenome-wide association study of head and neck cancer across two large biobanks
Source: Springer Nature journal article supplement (doi:10.1186/s12916-024-03305-2), 2024-03-14
Supplement: MOESM1 [file 26859904]

## Additional file 1.

Polygenic risk score-based phenome-wide association study of head and neck cancer across two large biobanks. Young Chan Lee, Sang-Hyuk Jung, Manu Shivakumar, Soojin Cha, Woong-Yang Park, Hong-Hee Won, Young-Gyu Eun, Penn Medicine Biobank, Dokyoon Kim.

### Supplementary contents

**Method S1.** Penn Medicine Biobank banner author list and contribution statements.

**Method S2.** Detailed definition of HNSCC.

**Method S3.** Detailed information on the genotype data quality control and imputation procedures.

**Method S4.** Generation of polygenic risk scores.

**Method S5.** Number of missing data for each variable in the UK Biobank.

**Table S1.** Characteristics of participants in the UK Biobank.

**Table S2.** Characteristics of participants in the Penn Medicine Biobank.

**Table S3.** Odds ratio for HNSCC and its subtypes associated with genetic risk in the UK Biobank.

**Table S4.** Odds ratio for HNSCC and its subtypes associated with genetic risk across subgroups by age, sex, and smoking status in the UK Biobank.

**Table S5.** Odds ratio for HNSCC and its subtypes associated with genetic risk in the Penn Medicine Biobank.

**Table S6.** Odds ratio for HNSCC associated with genetic risk across different case-control ratios in the UK Biobank and Penn Medicine Biobank.

**Table S7.** The ancestry-specific odds ratio for HNSCC associated with genetic risk in the Penn Medicine Biobank.

**Table S8.** Full results of HNSCC PRS-PheWAS in UK Biobank and Penn Medicine Biobank.

**Table S9.** Full results of OPC PRS-PheWAS in UK Biobank and Penn Medicine Biobank.

**Table S10.** Full results of OC PRS-PheWAS in UK Biobank and Penn Medicine Biobank.

\*Tables S8-10 are provided in Additional file 2 (as an Excel file).

**Figure S1.** Study flowchart.

**Figure S2.** Prevalence plot for significant phenotypes in PheWAS according to genetic risk groups.

35 **Method S1.** Penn Medicine Biobank banner author list and contribution statements.

36

37 **PMBB Leadership Team**

38 Daniel J. Rader, M.D., Marylyn D. Ritchie, Ph.D.

39 Contributions: All authors contributed to securing funding, study design, and oversight. All authors  
40 reviewed the final version of the manuscript.

41

42 **Patient Recruitment and Regulatory Oversight**

43 JoEllen Weaver, Nawar Naseer, Ph.D., M.P.H., Giorgio Sirugo, M.D., Ph.D., Afiya Poindexter, Yi-An Ko,  
44 Ph.D., Kyle P. Nerz

45 Contributions: JW manages patient recruitment and regulatory oversight of the study. NN manages  
46 participant engagement, assists with regulatory oversight, and researcher access. GS assists with researcher  
47 access. AP, YK, KPN perform recruitment and enrollment of study participants.

48

49 **Lab Operations**

50 JoEllen Weaver, Meghan Livingstone, Fred Vadivieso, Stephanie DerOhannessian, Teo Tran, Julia  
51 Stephanowski, Salma Santos, Ned Haubein, Ph.D., Joseph Dunn

52 Contributions: JW, ML, FV, SD conduct oversight of lab operations. ML, FV, AK, SD, TT, JS, SS perform  
53 sample processing. NH, JD are responsible for sample tracking and the laboratory information management  
54 system.

55

56 **Clinical Informatics**

57 Anurag Verma, Ph.D., Colleen Morse Kripke, M.S. DPT, MSA, Marjorie Risman, M.S., Renae Judy, B.S.,  
58 Colin Wollack, M.S.

59 Contributions: All authors contributed to the development and validation of clinical phenotypes used to  
60 identify study subjects and (when applicable) controls.

61

62 **Genome Informatics**

63 Anurag Verma Ph.D., Shefali S. Verma, Ph.D., Scott Damrauer, M.D., Yuki Bradford, M.S., Scott Dudek,  
64 M.S., Theodore Drivas, M.D., Ph.D.

65 Contributions: AV, SSV, and SD are responsible for the analysis, design, and infrastructure needed to  
66 quality control genotype and exome data. YB performs the analysis. TD and AV provide variant and gene  
67 annotations and their functional interpretation of variants.

68 **Method S2.** Detailed definition of HNSCC.

| Study reference                                                 | Definition                                        | Detail criteria <sup>§</sup>                                                                                                                                                                                           |                                                                                           |                                                                                                                              |
|-----------------------------------------------------------------|---------------------------------------------------|------------------------------------------------------------------------------------------------------------------------------------------------------------------------------------------------------------------------|-------------------------------------------------------------------------------------------|------------------------------------------------------------------------------------------------------------------------------|
|                                                                 |                                                   | HNSCC cases                                                                                                                                                                                                            | OPC cases                                                                                 | OC cases                                                                                                                     |
| <b>GAME-ON</b><br>(Derivation set for PRS generation)           | (1) HNSCC (head and neck squamous cell carcinoma) | <b>ICD-10 codes:</b><br>Union of Oropharynx, Oral cavity, and hypopharynx (C13.0–C13.9) and overlapping (C14 and combination of the codes for other sites); 25 oral or pharyngeal cases had unknown ICD codes (others) | <b>ICD-10 codes:</b><br>oropharynx (C01.9, C02.4 and C09.0–C10.9).                        | <b>ICD-10 codes:</b><br>oral cavity (C02.0–C02.9, C03.0–C03.9, C04.0–C04.9 and C05.0–C06.9).                                 |
|                                                                 | (2) OPC (oropharynx)                              |                                                                                                                                                                                                                        |                                                                                           |                                                                                                                              |
|                                                                 | (3) OC (oral cavity)                              |                                                                                                                                                                                                                        |                                                                                           |                                                                                                                              |
| <b>UK Biobank</b><br>(Validation set in this study)             | (1) HNSCC                                         | <b>ICD-9 codes:</b><br>Union of Oropharynx, Oral cavity, and larynx (1610-1619)                                                                                                                                        | <b>ICD-9 codes:</b><br>Oropharynx (1453, 1460,1461)                                       | <b>ICD-9 codes:</b><br>Oral cavity (140.0–140.9, 141.0–141.9, 142.0–142.8, 143.0–143.9, 144.0–144.9, 145.0–145.9, and 230.0) |
|                                                                 | (2) OPC                                           | <b>ICD-10 codes:</b><br>Union of Oropharynx, Oral cavity, hypopharynx (C12.9, C13.0–C13.2, C13.8, and C13.9) and larynx (C32.0–C32.3, C32.8 and C32.9)                                                                 | <b>ICD-10 codes:</b><br>Oropharynx (C01, C02.0, C02.4, C05.1, C05.2, C09.0-C10.9, C14.0). | <b>ICD-10 codes:</b><br>Oral cavity (C00.0- C00.9, C02.0–C02.9, C03.0–C03.9, C04.0–C04.9, C05.0–C06.9, C148).                |
|                                                                 | (3) OC                                            |                                                                                                                                                                                                                        |                                                                                           |                                                                                                                              |
| <b>Penn Medicine Biobank</b><br>(Replication set in this study) | (1) HNSCC                                         | <b>ICD-9 codes:</b><br>Union of Oropharynx and Oral cavity.                                                                                                                                                            | <b>ICD-9 codes:</b><br>Oropharynx (146.0–149.9)                                           | <b>ICD-9 codes:</b><br>Oral cavity (140.0–140.9, 141.0–141.9, 142.0–142.8, 143.0–143.9, 144.0–144.9, 145.0–145.9, and 230.0) |
|                                                                 | (2) OPC                                           | <b>ICD-10 codes:</b><br>Union of Oropharynx and Oral cavity.                                                                                                                                                           | <b>ICD-10 codes:</b><br>Oropharynx (C01.9, C02.4 and C09.0–C10.9).                        | <b>ICD-10 codes:</b><br>Oral cavity (C02.0–C02.9, C03.0–C03.9, C04.0–C04.9 and C05.0–C06.9).                                 |
|                                                                 | (3) OC                                            |                                                                                                                                                                                                                        |                                                                                           |                                                                                                                              |

69 Abbreviations: GAME-ON, Genetic Associations and Mechanisms in Oncology; ICD,  
70 International Statistical Classification of Diseases and Related Health Problems; HNSCC, head  
71 and neck squamous cell carcinoma; OC, oral cavity cancer; OPC, oropharynx cancer.

72 **Method S3.** Detailed information on the genotype data quality control and imputation procedures.

73 ***UK Biobank***

74 UK Biobank samples (version 3; March 2018) were genotyped for > 800,000 SNPs using either the  
75 Affymetrix UK BiLEVE Axiom array or the Affymetrix UK Biobank Axiom array. Imputation was  
76 carried out centrally by UK Biobank researchers using the merged 1000 Genomes Project panel and  
77 UK 10K panel; SHAPEIT3 was used for phasing and IMPUTE2 was used for imputation  
78 (GRCh37/hg19) [14, 15]. After imputation, variant-level quality control (QC) was performed by  
79 filtering SNPs on two criteria: (i) minor allele frequency < 1%, (ii) imputation quality score  
80 (INFO) < 0.3, and (iii) the Hardy–Weinberg equilibrium with a  $P$ -value of <  $10^{-6}$ . A total of 9,505,768  
81 imputed autosomal SNPs passed the QC criteria. Sample-level QC was performed by excluding  
82 samples on the basis of (i) participants identified as not of ‘White-British’ ancestry according to either  
83 self-report or principal components (PC) analysis of genetic ancestry, (ii) mismatched sex, and (iii)  
84 having second-degree or closer relatives also in the Biobank. After exclusion, 308,492 White-British  
85 participants were determined eligible for the genetic analyses.

86

87 ***Penn Medicine Biobank***

88 Penn Medicine Biobank consists of 43,623 samples that have been genotyped by the GSA genotyping  
89 array. We performed genotype imputations for two Penn Medicine Biobank datasets using Eagle2 [16]  
90 and Minimac4 [17] softwares on TOPMed Imputation Server [18]. Imputation was performed for all  
91 autosomes, with TOPMed version R2 on GRCh38 reference panel [19]. After imputation, variant-level  
92 QC was performed by filtering SNPs on three criteria: (i) minor allele frequency < 0.01, (ii) marker  
93 call rate < 0.05, and (iii) INFO < 0.2. Sample-level QC was performed by excluding samples on the  
94 basis of (i) mismatched sex or (ii) having second-degree or closer relatives also in the Biobank. We  
95 inferred ancestry by projecting array genotype data onto PC axes defined by individuals from the  
96 HapMap3 [20]. Then, we performed a kernel density estimator (KDE) algorithm on all samples to  
97 determine their genetically informed ancestry. We trained a KDE using the HapMap3 PCs and used  
98 the KDEs to calculate the likelihood of a given sample belonging to each of the five continental  
99 ancestry groups. Samples were excluded from analysis if no ancestry likelihoods were greater than 0.3,  
100 or if more than three ancestry likelihoods were greater than 0.3. After exclusion, a total of 27,933  
101 individuals considered European (non-Hispanic White) ancestry and 10,468 individuals considered  
102 African American (non-Hispanic Black) ancestry were determined eligible for the replication analyses.

103 **Method S4.** Generation of polygenic risk scores.

104 To generate polygenic risk scores (PRSs), we utilized the genome-wide association study (GWAS)  
 105 summary statistics from the GAME-ON ([https://www.ncbi.nlm.nih.gov/projects/gap/cgi-](https://www.ncbi.nlm.nih.gov/projects/gap/cgi-bin/study.cgi?study_id=phs001202.v1.p1)  
 106 [bin/study.cgi?study\\_id=phs001202.v1.p1](https://www.ncbi.nlm.nih.gov/projects/gap/cgi-bin/study.cgi?study_id=phs001202.v1.p1)) Network. The HNSCC, OPC, and OC cases were  
 107 identified based on the following ICD-10 codes: oral cavity (C02.0–C02.9, C03.0–C03.9, C04.0–  
 108 C04.9, and C05.0–C06.9) and oropharynx (C01.9, C02.4, and C09.0–C10.9). The GWASs  
 109 (HNSCC [5,974 cases and 4,012 controls], OPC [2,617 cases and 4,012 controls], and OC [2,958  
 110 cases and 4,012 controls]). The GWASs were performed using PLINK 1.90 with sex, age, 10 PCs,  
 111 and genotyping batch as covariates. The genotype data for the oral and pharyngeal OncoArray  
 112 study can be downloaded from the database of Genotypes and Phenotypes (dbGaP) under  
 113 accession phs001202.v1.p1. Of note, the GWASs did not include the additional external controls  
 114 (2,476 shared controls [1,453 from the EPIC study and 1,023 from the Toronto study]) beyond the  
 115 GAME-ON data used by Lesueur, Corina, et al. [21] in their GWAS analysis.

116 We constructed PRSs for HNSCC, OPC, and OC by using a Bayesian polygenic prediction  
 117 method, PRS-CS [22], which infers the posterior mean effect size of each variant using the linkage  
 118 disequilibrium (LD) reference panel and GWAS summary. The 1000G Project phase 3 EUR data  
 119 was used to be the external LD reference panel. The posterior SNP effect sizes in PRS-CS were  
 120 inferred from GAME-ON summary statistics, with default settings, and automatic estimation of  
 121 the global shrinkage parameter (PRS-CS-auto). The individual PRSs were computed from beta  
 122 coefficients as the weighted sum of the risk alleles by applying PLINK version 1.90 with the –  
 123 score command [23]. The detailed number of SNPs used in the analysis is depicted as follows  
 124 (**Table**).

125 **Table.** Number of used SNPs in generating PRSs.

| PRS       | GAME-ON   | 1000G hapmap3       | UK Biobank    | Penn Medicine   |
|-----------|-----------|---------------------|---------------|-----------------|
|           | (GWAS)    | (as reference SNPs) |               | Biobank         |
|           | Base set  | LD reference panel  | Discovery set | Replication set |
| HNSCC PRS | 9,396,590 | 1,120,697           | 972,182       | 967,888         |
| OPC PRS   | 9,396,590 | 1,120,697           | 972,182       | 967,888         |
| OC PRS    | 9,396,590 | 1,120,697           | 972,182       | 967,888         |

126 Abbreviations: GWAS, genome-wide association study; SNP, single nucleotide polymorphism; PRS, polygenic risk  
 127 score; HNSCC, head and neck squamous cell carcinoma; OC, oral cavity cancer; OPC, oropharynx cancer; LD,  
 128 linkage disequilibrium.

129 **Method S5.** Number of missing data for each variable in the UK Biobank.

| <b>Variable</b>                                                                       | <b>Field ID</b> | <b>No. of missing data (%)</b> |
|---------------------------------------------------------------------------------------|-----------------|--------------------------------|
| <b>Total number of participants</b>                                                   | n/a             | <b>(n=308,492)</b>             |
| <b>Smoking</b>                                                                        |                 |                                |
| Current tobacco smoking                                                               | 1239            | 206 (0.07%)                    |
| Past tobacco smoking                                                                  | 1249            | 24,417 (7.91%)                 |
| Maternal smoking around birth                                                         | 1787            | 43,425 (14.08%)                |
| Number of cigarettes previously smoked daily                                          | 2887            | 231,892 (75.17%)               |
| Age stopped smoking                                                                   | 2897            | 227,870 (73.87%)               |
| Number of unsuccessful stop-smoking attempts                                          | 2926            | 234,527 (76.02%)               |
| Smoking status                                                                        | 20116           | 1,143 (0.37%)                  |
| Pack years of smoking                                                                 | 20161           | 209,584 (67.94%)               |
| <b>Alcohol</b>                                                                        |                 |                                |
| Alcohol intake frequency                                                              | 1558            | 0 (0.00%)                      |
| Alcohol usually taken with meals                                                      | 1618            | 143,325 (46.46%)               |
| Alcohol intake versus 10 years previously                                             | 1628            | 23,247 (7.54%)                 |
| Alcohol drinker status                                                                | 20117           | 332 (0.11%)                    |
| Amount of alcohol drunk on a typical drinking day                                     | 20403           | 221,464 (71.79%)               |
| Ever physically dependent on alcohol                                                  | 20404           | 306,335 (99.30%)               |
| Ever had known person concerned about, or recommend reduction of, alcohol consumption | 20405           | 213,001 (69.05%)               |
| Frequency of consuming six or more units of alcohol                                   | 20416           | 221,259 (71.72%)               |
| Other non-alcoholic drinks                                                            | 100510          | 180,608 (58.55%)               |
| <b>HPV</b>                                                                            |                 |                                |
| HPV type-16                                                                           | 23075           | 302,570 (98.08%)               |

130 Abbreviation: HPV, Human papillomavirus.

131 **Table S1.** Characteristics of participants in the UK Biobank.

|                                          | <b>Total<br/>(n=308,492)</b> | <b>Control<br/>(n= 306,739)</b> | <b>HNSCC case<br/>(n=1,753)</b> | <b>P-value*</b> |
|------------------------------------------|------------------------------|---------------------------------|---------------------------------|-----------------|
| <b>Age, mean ± SD</b>                    | 58.0 ± 7.9                   | 58.0 ± 7.9                      | 59.9 ± 6.9                      | <.001           |
| <b>Sex, No. (%)</b>                      |                              |                                 |                                 | <.001           |
| <b>Male</b>                              | 140,232 (45.5%)              | 139,052 (45.3%)                 | 1,180 (67.3%)                   |                 |
| <b>Female</b>                            | 168,260 (54.5%)              | 167,687 (54.7%)                 | 573 (32.7%)                     |                 |
| <b>HNSCC subtypes, No. (%)</b>           |                              |                                 |                                 | n/a             |
| <b>OPC</b>                               | 556 (0.2%)                   | n/a                             | 556 (31.7%)                     |                 |
| <b>OC</b>                                | 856 (0.3%)                   | n/a                             | 856 (48.8%)                     |                 |
| <b>Others</b>                            | 341 (0.1%)                   | n/a                             | 341 (19.5%)                     |                 |
| <b>Smoking status, No. (%)</b>           |                              |                                 |                                 | <.001           |
| Never                                    | 162,723 (52.9%)              | 162,142 (53.1%)                 | 581 (33.4%)                     |                 |
| Previous                                 | 112,322 (36.5%)              | 111,527 (36.5%)                 | 795 (45.7%)                     |                 |
| Current                                  | 32,304 (10.5%)               | 31,939 (10.5%)                  | 365 (21.0%)                     |                 |
| <b>Alcohol intake frequency, No. (%)</b> |                              |                                 |                                 | <.001           |
| Daily or almost daily                    | 23,107 (7.5%)                | 22,943 (7.5%)                   | 164 (9.4%)                      |                 |
| Three or four times a week               | 60,402 (19.6%)               | 59,925 (19.5%)                  | 477 (27.2%)                     |                 |
| Once or twice a week                     | 71,160 (23.1%)               | 70,788 (23.1%)                  | 372 (21.2%)                     |                 |
| One to three times a month               | 82,213 (26.7%)               | 81,776 (26.7%)                  | 437 (24.9%)                     |                 |
| Special occasions only                   | 35,678 (11.6%)               | 35,537 (11.6%)                  | 141 (8.0%)                      |                 |
| Never                                    | 35,887 (11.6%)               | 35,725 (11.6%)                  | 162 (9.2%)                      |                 |
| <b>HPV positivity, No. (%)</b>           |                              |                                 |                                 | <.001           |
| <b>Positive</b>                          | 276 (4.7%)                   | 267 (4.5%)                      | 9 (26.5%)                       |                 |
| <b>Negative</b>                          | 5,646 (95.3%)                | 5,621 (95.5%)                   | 25 (73.5%)                      |                 |

132 \*P-value indicates the significance of the difference between the control and HNSCC case  
133 groups. Abbreviations: HPV, Human papillomavirus; HNSCC, head and neck squamous cell  
134 carcinoma; OC, oral cavity cancer; OPC, oropharynx cancer; SD, standard deviation.

135 **Table S2.** Characteristics of participants in the Penn Medicine Biobank.

|                                | <b>Total</b><br>(n=38,401) | <b>Control</b><br>(n=37,670) | <b>HNSCC case</b><br>(n=731) | <b>P-value*</b> |
|--------------------------------|----------------------------|------------------------------|------------------------------|-----------------|
| <b>Age, mean ± SD</b>          | 55.9 ± 16.4                | 55.7 ± 16.4                  | 63.4 ± 11.0                  | <.001           |
| <b>Sex, No. (%)</b>            |                            |                              |                              | <.001           |
| <b>Male</b>                    | 19,165 (49.9%)             | 18,614 (49.4%)               | 551 (75.4%)                  |                 |
| <b>Female</b>                  | 19,236 (50.1%)             | 19,056 (50.6%)               | 180 (24.6%)                  |                 |
| <b>Ancestry, No. (%)</b>       |                            |                              |                              | <.001           |
| <b>European</b>                | 27,933 (72.7%)             | 27,276 (72.4%)               | 657 (89.9%)                  |                 |
| <b>African American</b>        | 10,468 (27.3%)             | 10,394 (27.6%)               | 74 (10.1%)                   |                 |
| <b>HNSCC subtypes, No. (%)</b> |                            |                              |                              | n/a             |
| <b>OPC</b>                     | 231 (0.6%)                 | n/a                          | 231 (31.6%)                  |                 |
| <b>OC</b>                      | 437 (1.1%)                 | n/a                          | 437 (59.8%)                  |                 |
| <b>Others</b>                  | 64 (0.2%)                  | n/a                          | 64 (8.8%)                    |                 |

136 \*P-value indicates the significance of the difference between the control and HNSCC case  
137 groups. Abbreviations: HNSCC, head and neck squamous cell carcinoma; OC, oral cavity  
138 cancer; OPC, oropharynx cancer; SD, standard deviation.



139 **Table S3.** Odds ratio for HNSCC and its subtypes associated with genetic risk in the UK Biobank.

| Outcome      | Total no. of participants | No. of cases (%) | HNSCC PRS                  |         |                        | OPC PRS                    |         |                        | OC PRS                     |         |                        |
|--------------|---------------------------|------------------|----------------------------|---------|------------------------|----------------------------|---------|------------------------|----------------------------|---------|------------------------|
|              |                           |                  | OR perSD increase (95% CI) | P-value | *Variance explained, % | OR perSD increase (95% CI) | P-value | *Variance explained, % | OR perSD increase (95% CI) | P-value | *Variance explained, % |
| <b>HNSCC</b> | 308,492                   | 1,753 (0.57%)    | 1.12 (1.06-1.17)           | <.001   | 0.38                   | 1.10 (1.05-1.16)           | <.001   | 0.36                   | 1.09 (1.04-1.15)           | <.001   | 0.34                   |
| <b>OPC</b>   | 307,295                   | 556 (0.18%)      | 1.18 (1.08-1.28)           | <.001   | 0.47                   | 1.20 (1.10-1.31)           | <.001   | 0.51                   | 1.10 (1.01-1.20)           | .027    | 0.35                   |
| <b>OC</b>    | 307,295                   | 856 (0.28%)      | 1.10 (1.02-1.17)           | .009    | 0.27                   | 1.07 (1.00-1.15)           | .058    | 0.24                   | 1.09 (1.02-1.17)           | .015    | 0.26                   |

140 All analyses were adjusted by age, sex, genotype array, and PC 1 to 10.

141 \*The proportion of variance explained for PRS alone was computed as Nagelkerke's pseudo-R<sup>2</sup>.

142 Abbreviations: HNSCC, head and neck squamous cell carcinoma; OC, oral cavity cancer; OPC, oropharynx cancer; PRS, polygenic  
 143 risk score; SD, standard deviation; OR, Odds ratio; CI, confidence interval; PC, principal component.

144 **Table S4.** Odds ratio for HNSCC and its subtypes associated with genetic risk across subgroups by age, sex, and smoking status in the  
 145 UK Biobank.

| Subgroup                           | Outcome | HNSCC PRS                                      |                                  |                 | OPC PRS                          |                 | OC PRS                           |                 |
|------------------------------------|---------|------------------------------------------------|----------------------------------|-----------------|----------------------------------|-----------------|----------------------------------|-----------------|
|                                    |         | Total no. of participants/<br>no. of cases (%) | OR perSD<br>increase<br>(95% CI) | P-value         | OR perSD<br>increase<br>(95% CI) | P-value         | OR perSD<br>increase<br>(95% CI) | P-value         |
| <b>Younger</b><br>(Age ≤ 60 years) | HNSCC   | 166,624/791                                    | 1.07 (1.00-1.15)                 | .059            | <b>1.11 (1.03-1.19)</b>          | <b>.006</b>     | 1.03 (0.95-1.10)                 | .496            |
|                                    | OPC     | 166,624/323                                    | <b>1.13 (1.01-1.27)</b>          | <b>.032</b>     | <b>1.24 (1.11-1.38)</b>          | <b>&lt;.001</b> | 1.01 (0.90-1.13)                 | .865            |
|                                    | OC      | 166,624/396                                    | 1.05 (0.95-1.16)                 | .375            | 1.05 (0.95-1.16)                 | .323            | 1.03 (0.94-1.14)                 | .507            |
| <b>Elderly</b><br>(Age > 60 years) | HNSCC   | 141,868/962                                    | <b>1.16 (1.08-1.23)</b>          | <b>&lt;.001</b> | <b>1.10 (1.03-1.17)</b>          | <b>.004</b>     | <b>1.15 (1.08-1.23)</b>          | <b>&lt;.001</b> |
|                                    | OPC     | 141,868/233                                    | <b>1.25 (1.09-1.43)</b>          | <b>&lt;.001</b> | <b>1.16 (1.01-1.32)</b>          | <b>.029</b>     | <b>1.24 (1.09-1.41)</b>          | <b>.001</b>     |
|                                    | OC      | 141,868/460                                    | <b>1.14 (1.04-1.25)</b>          | <b>.006</b>     | 1.08 (0.99-1.19)                 | .091            | <b>1.14 (1.04-1.25)</b>          | <b>.007</b>     |
| <b>Male</b>                        | HNSCC   | 140,232/1,180                                  | <b>1.12 (1.06-1.19)</b>          | <b>&lt;.001</b> | <b>1.10 (1.04-1.17)</b>          | <b>.002</b>     | <b>1.08 (1.02-1.15)</b>          | <b>.008</b>     |
|                                    | OPC     | 140,232/404                                    | <b>1.18 (1.06-1.30)</b>          | <b>.001</b>     | <b>1.23 (1.11-1.36)</b>          | <b>&lt;.001</b> | 1.08 (0.98-1.19)                 | .131            |
|                                    | OC      | 140,232/513                                    | 1.08 (0.99-1.18)                 | .079            | 1.07 (0.98-1.17)                 | .130            | 1.06 (0.97-1.16)                 | .182            |
| <b>Female</b>                      | HNSCC   | 168,260/573                                    | <b>1.11 (1.02-1.21)</b>          | <b>.014</b>     | <b>1.11 (1.02-1.20)</b>          | <b>.017</b>     | <b>1.11 (1.02-1.21)</b>          | <b>.013</b>     |
|                                    | OPC     | 168,260/152                                    | <b>1.18 (1.00-1.24)</b>          | <b>.045</b>     | 1.13 (0.96-1.32)                 | .156            | 1.16 (0.98-1.36)                 | .077            |
|                                    | OC      | 168,260/343                                    | <b>1.12 (1.00-1.24)</b>          | <b>.048</b>     | 1.07 (0.96-1.19)                 | .251            | <b>1.13 (1.01-1.26)</b>          | <b>.028</b>     |
| <b>Never-smoker</b>                | HNSCC   | 119,038/413                                    | <b>1.10 (1.00-1.22)</b>          | <b>.050</b>     | 1.08 (0.98-1.19)                 | .131            | <b>1.11 (1.01-1.23)</b>          | <b>.036</b>     |
|                                    | OPC     | 119,038/119                                    | 1.16 (0.96-1.39)                 | .118            | 1.16 (0.97-1.40)                 | .106            | 1.16 (0.96-1.39)                 | .123            |
|                                    | OC      | 119,038/223                                    | 1.11 (0.97-1.27)                 | .128            | 1.07 (0.94-1.23)                 | .320            | 1.13 (0.99-1.30)                 | .069            |
| <b>Ever-smoker</b>                 | HNSCC   | 190,562/1,328                                  | <b>1.12 (1.06-1.18)</b>          | <b>&lt;.001</b> | <b>1.11 (1.05-1.17)</b>          | <b>&lt;.001</b> | <b>1.09 (1.03-1.15)</b>          | <b>.003</b>     |
|                                    | OPC     | 190,562/433                                    | <b>1.17 (1.06-1.29)</b>          | <b>.001</b>     | <b>1.21 (1.10-1.33)</b>          | <b>&lt;.001</b> | 1.08 (0.98-1.19)                 | .113            |
|                                    | OC      | 190,562/628                                    | <b>1.09 (1.00-1.18)</b>          | <b>.038</b>     | 1.07 (0.98-1.16)                 | .112            | 1.07 (0.99-1.16)                 | .077            |

146 All analyses were adjusted by age, sex, genotype array, and PC 1 to 10.

147 Abbreviations: HNSCC, head and neck squamous cell carcinoma; OC, oral cavity cancer; OPC, oropharynx cancer; PRS, polygenic

148 risk score; SD, standard deviation; OR, Odds ratio; CI, confidence interval; PC, principal component.

149 **Table S5.** Odds ratio for HNSCC and its subtypes associated with genetic risk in the Penn Medicine Biobank.

| Outcome      | Total no. of participants | No. of cases (%) | HNSCC PRS                  |                 |                        | OPC PRS                    |                 |                        | OC PRS                     |                 |                        |
|--------------|---------------------------|------------------|----------------------------|-----------------|------------------------|----------------------------|-----------------|------------------------|----------------------------|-----------------|------------------------|
|              |                           |                  | OR perSD increase (95% CI) | <i>P</i> -value | *Variance explained, % | OR perSD increase (95% CI) | <i>P</i> -value | *Variance explained, % | OR perSD increase (95% CI) | <i>P</i> -value | *Variance explained, % |
| <b>HNSCC</b> | 38,401                    | 731 (1.90%)      | 1.17 (1.07-1.26)           | <.001           | 2.46                   | 1.25 (1.09-1.44)           | .002            | 2.42                   | 1.12 (1.01-1.25)           | .027            | 2.42                   |
| <b>OPC</b>   | 37,901                    | 231 (0.61%)      | 1.13 (1.05-1.22)           | .002            | 2.60                   | 1.24 (1.08-1.42)           | .002            | 2.63                   | 1.11 (1.00-1.22)           | .040            | 2.46                   |
| <b>OC</b>    | 38,107                    | 437 (1.15%)      | 1.14 (1.06-1.23)           | <.001           | 2.56                   | 1.18 (1.03-1.35)           | .017            | 2.56                   | 1.08 (0.98 - 1.19)         | .136            | 2.51                   |

150 All analyses were adjusted by age, sex, ethnicity, and PC 1 to 10.

151 \*The proportion of variance explained for PRS alone was computed as Nagelkerke's pseudo-R<sup>2</sup>.

152 Abbreviations: HNSCC, head and neck squamous cell carcinoma; OC, oral cavity cancer; OPC, oropharynx cancer; PRS, polygenic  
 153 risk score; SD, standard deviation; OR, Odds ratio; CI, confidence interval; PC, principal component.

154 **Table S6.** Odds ratio for HNSCC associated with genetic risk across different case-control ratios in the UK Biobank and Penn  
 155 Medicine Biobank.

| Ratio*<br>(case:control) | UK Biobank <sup>1</sup>  |                               |         |                            | Penn Medicine Biobank <sup>2</sup> |                               |         |                            |
|--------------------------|--------------------------|-------------------------------|---------|----------------------------|------------------------------------|-------------------------------|---------|----------------------------|
|                          | Total no. of<br>controls | OR perSD<br>increase (95% CI) | P-value | **Variance<br>explained, % | Total no. of<br>controls           | OR perSD<br>increase (95% CI) | P-value | **Variance<br>explained, % |
| <b>full</b>              | 306,739                  | 1.12 (1.06-1.17)              | <.001   | 0.38                       | 37,670                             | 1.17 (1.07-1.26)              | <.001   | 2.46                       |
| <b>1:10</b>              | 17,530                   | 1.10 (1.05-1.16)              | <.001   | 0.88                       | 7,310                              | 1.14 (1.05-1.24)              | .002    | 2.57                       |
| <b>1:5</b>               | 8,765                    | 1.08 (1.03-1.14)              | .003    | 1.10                       | 3,655                              | 1.16 (1.06-1.26)              | .001    | 3.47                       |
| <b>1:3</b>               | 5,259                    | 1.09 (1.03-1.16)              | .002    | 1.28                       | 2,193                              | 1.16 (1.06-1.27)              | .002    | 4.16                       |
| <b>1:1</b>               | 1,753                    | 1.09 (1.02-1.17)              | .013    | 1.72                       | 731                                | 1.15 (1.02-1.29)              | .012    | 4.85                       |

156 <sup>1</sup>The UK Biobank analyses were adjusted by age, sex, genotype array, and PC 1 to 10.

157 <sup>2</sup>The Penn Medicine Biobank analyses were adjusted by age, sex, ethnicity, and PC 1 to 10.

158 \*Controls were extracted from samples matched for age and sex with cases for each ratio using the “matchIt” R package.

159 \*\*The proportion of variance explained for PRS alone was computed as Nagelkerke’s pseudo-R<sup>2</sup>.

160 Abbreviations: HNSCC, head and neck squamous cell carcinoma; OC, oral cavity cancer; OPC, oropharynx cancer; PRS, polygenic  
 161 risk score; SD, standard deviation; OR, Odds ratio; CI, confidence interval; PC, principal component.

162 **Table S7.** The ancestry-specific odds ratio for HNSCC associated with genetic risk in the Penn Medicine Biobank.

| <b>Cohort</b> | <b>Ancestry</b>  | <b>Total no. of participants</b> | <b>No. of cases (%)</b> | <b>OR perSD increase (95% CI)</b> | <b>P-value</b> | <b>*Variance explained, %</b> |
|---------------|------------------|----------------------------------|-------------------------|-----------------------------------|----------------|-------------------------------|
| <b>PMBB</b>   | European         | 27,933                           | 657 (2.35%)             | 1.14 (1.05-1.24)                  | .001           | 4.44                          |
|               | African American | 10,468                           | 74 (0.71%)              | 1.27 (1.01-1.60)                  | .045           | 6.66                          |

163 All analyses were adjusted by age, sex, and PC 1 to 10.

164 \*The proportion of variance explained for PRS alone was computed as Nagelkerke's pseudo-R2.

165 Abbreviations: PMBB, Penn Medicine Biobank; HNSCC, head and neck squamous cell carcinoma; SD, standard deviation; OR, Odds  
 166 ratio; CI, confidence interval; PC, principal component.

167 **Table S8.** Full results of HNSCC PRS-PheWAS in UK Biobank and Penn Medicine Biobank.

168 **Table S9.** Full results of OPC PRS-PheWAS in UK Biobank and Penn Medicine Biobank.

169 **Table S10.** Full results of OC PRS-PheWAS in UK Biobank and Penn Medicine Biobank.

170 \*Tables S8-10 are provided in Additional file 2 (as an Excel file).

171 **Figure S1.** Study flowchart.

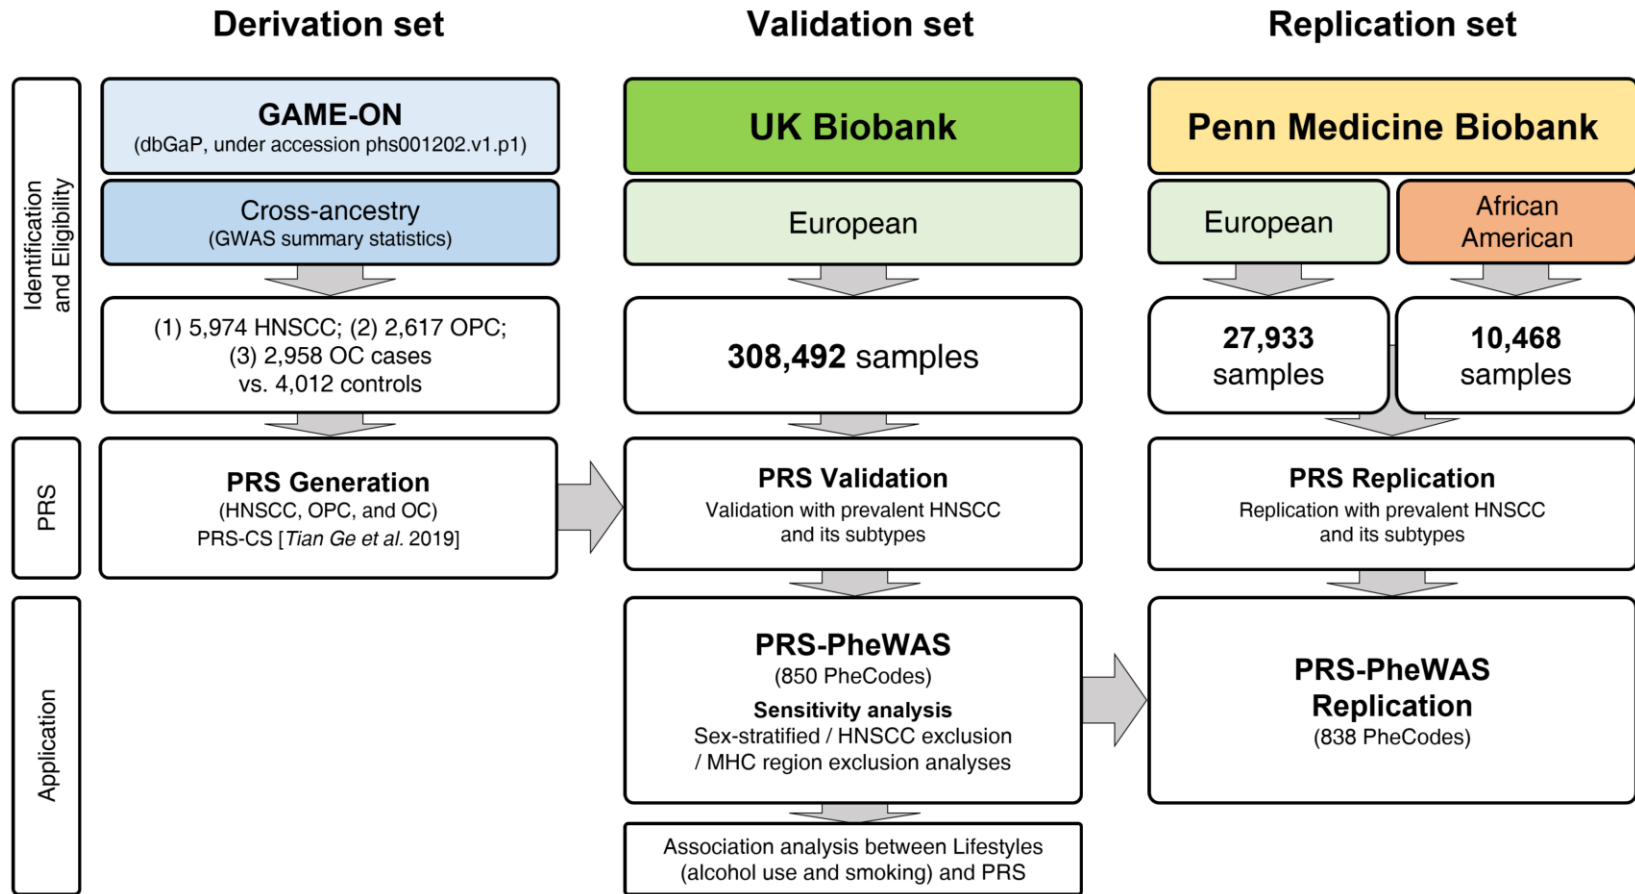

172

173 Abbreviations: HNSCC, head and neck squamous cell carcinoma; OC, oral cavity cancer; OPC, oropharynx cancer; PRS, polygenic

174 risk score.



175 **Figure S2.** Prevalence plot for significant phenotypes in PheWAS according to genetic risk groups.

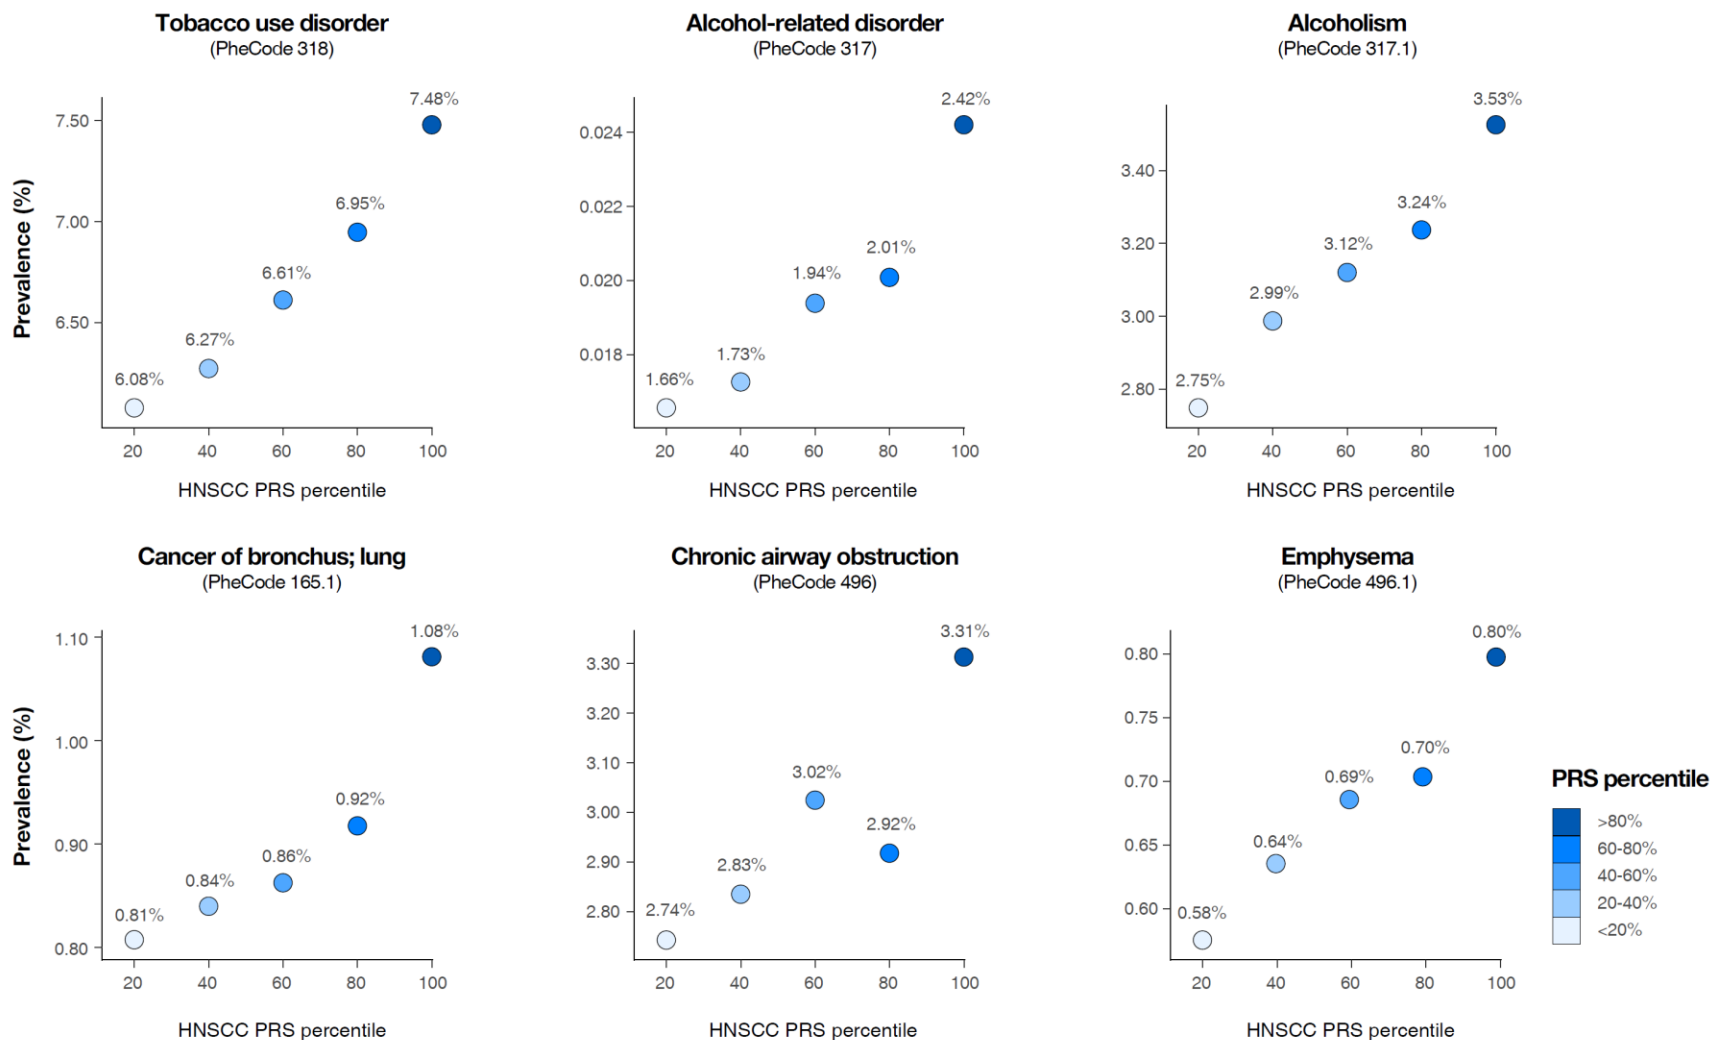

176

177 Abbreviations: HNSCC, head and neck squamous cell carcinoma; PRS, polygenic risk score.
